# Supplementary material for: Effect of polar organic vapors on surface potential of Au nanoparticle aggregates probed by surface-enhanced Raman scattering of 2,6-dimethylphenylisocyanide
Source: Royal Society of Chemistry journal article supplement (doi:10.1039/b927587h), 2010-01-01
Supplement: b927587h.pdf [file b927587h.pdf]

## Electronic Supplementary Information

### **Effect of Polar Organic Vapors on Surface Potential of Au Nanoparticle Aggregates Probed By Surface-Enhanced Raman Scattering of 2,6-Dimethylphenylisocyanide**

Kwan Kim,<sup>\*a</sup> Kyung Lock Kim,<sup>a</sup> Dongha Shin,<sup>a</sup> Ji Won Lee,<sup>a</sup> and Kuan Soo Shin<sup>\*b</sup>

<sup>a</sup> *Department of Chemistry, Seoul National University, Seoul 151-742, Korea. E-mail:*

*kwankim@snu.ac.kr; Fax: +82 2 889 1568; Tel: +82 2 880 6651*

<sup>b</sup> *Department of Chemistry, Soongsil University, Seoul 156-743, Korea. E-mail:*

*kshin@ssu.ac.kr; Fax: +82 2 824 4383; Tel: +82 2 820 0436*

## Experimental details:

Hydrogen tetrachloroaurate ( $\text{HAuCl}_4$ , 99.99%), silver nitrate ( $\text{AgNO}_3$ , 99.99%), 2,6-dimethylphenylisocyanide (2,6-DMPI, 96%), dodecanethiol (98%), sodium perchlorate ( $\text{NaClO}_4$ , 98%), Au wire (99.9%), Ag wire (99.99%), and Pt wire (99.99%) were purchased from Aldrich, and used as received. Unless specified, other chemicals were reagent grade, and highly pure water whose resistivity is greater than  $18.0 \text{ M}\Omega\cdot\text{cm}$  was used throughout.

Aqueous Au sol was prepared following the recipes of Link et al.<sup>1</sup> Initially, 95 mL of aqueous  $\text{HAuCl}_4$  solution containing 5 mg of Au was brought to the boil, and 5 mL of 1% sodium citrate was added therein under vigorous stirring, and boiling was continued for ~30 min. On the other hand, the Ag sol was prepared by following the recipes of Lee and Meisel.<sup>2</sup> Initially, 45 mg of  $\text{AgNO}_3$  was dissolved in 250 mL of water, and the solution was brought to the boil. A solution of 1% sodium citrate (5 mL) was then added to the  $\text{AgNO}_3$  solution under vigorous stirring, and boiling was continued for ~30 min. The Au and Ag sol then showed distinct surface plasmon bands at 520 and 400 nm, respectively, in the UV-vis spectra, and according to the transmission electron microscopy (TEM) analysis, both nanoparticles were spherical with a mean diameter of ~35 nm.

The Au(Ag) film was prepared by dropping 15  $\mu\text{L}$  of Au(Ag) sol onto a mica substrate (1 mm  $\times$  30 mm). The injected mica substrate was left to dry under ambient conditions to form an Au(Ag) nanoaggregate film. After a thorough wash with water and drying in  $\text{N}_2$  atmosphere, the film was immersed in 1 mM ethanolic solution of 2,6-DMPI for 1 h. After thorough washing with ethanol and drying, the 2,6-DMPI-adsorbed Au(Ag) film was inserted into a glass capillary (1.2 mm in inner diameter and 75 mm in length), and then subjected to Raman spectral analysis under the flow of organic vapors.

For potential-dependent SERS measurements, Au(Ag) wire was roughened electrochemically in 0.1 M KCl solution by cycling between -0.8 V and +1.0 V (-0.4 V and +0.8 V) and then immersed in 1 mM ethanolic solution of 2,6-DMPI for 1 h. The modified Au(Ag) wire and a pure Pt wire were used as a working and counter electrodes, respectively, in 0.1 M  $\text{NaClO}_4$  solution. The potential of the electrochemical cell was controlled by using a CH Instruments model 660A potentiostat, which employed CHI 660A electrochemical

analyzer software (version 2.03) running on an IBM-compatible PC. All potentials are reported with respect to the Ag/AgCl electrode.

UV-visible (UV-vis) spectra were obtained with a SCINCO S-4100 spectrometer. TEMs were obtained with a JEM-200CX transmission electron microscope at 200 kV after placing a drop of the as-prepared sol onto Ni/Cu grids. AFM images were obtained using a Digital Instrument model Nanoscope IIIa scanning probe microscope. Using a V-shaped, 200  $\mu\text{m}$  long  $\text{Si}_3\text{N}_4$  cantilever with a nominal spring constant of 0.12 N/m (Nanoprobe, Digital Instruments), topographic images were recorded in the conventional height mode (tapping mode, normal AFM) at a scan rate of 1 ~ 2 Hz. Raman spectra were obtained using a Renishaw Raman system Model 2000 spectrometer equipped with an integral microscope (Olympus BH2-UMA). The 632.8 nm line from a 17 mW He/Ne laser (Spectra Physics Model 127) was used as the excitation source. The Raman band of a silicon wafer at 520  $\text{cm}^{-1}$  was used to calibrate the spectrometer, and the accuracy of the spectral measurement was estimated to be better than 1  $\text{cm}^{-1}$ .

## References

- 1 S. Link, Z. L. Wang and M. A. Elsayed., *J. Phys. Chem. B*, 1999, **103**, 3529.
- 2 P. C. Lee and D. Meisel., *J. Phys. Chem.*, 1982, **86**, 339

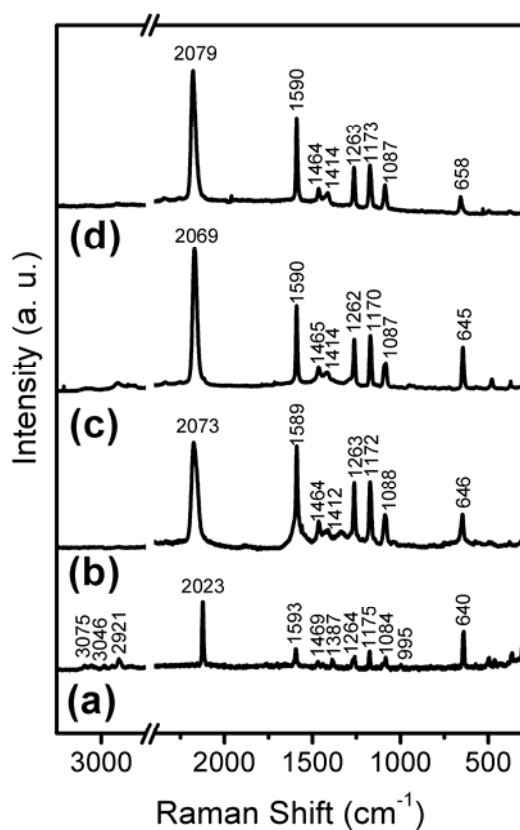

Fig. S1. (a) Normal Raman spectrum of 2,6-DMPI in neat state and its SERS spectrum (b) on Ag nanoparticle aggregates on a mica substrate, (c) in Ag sol, and (d) in Au sol.

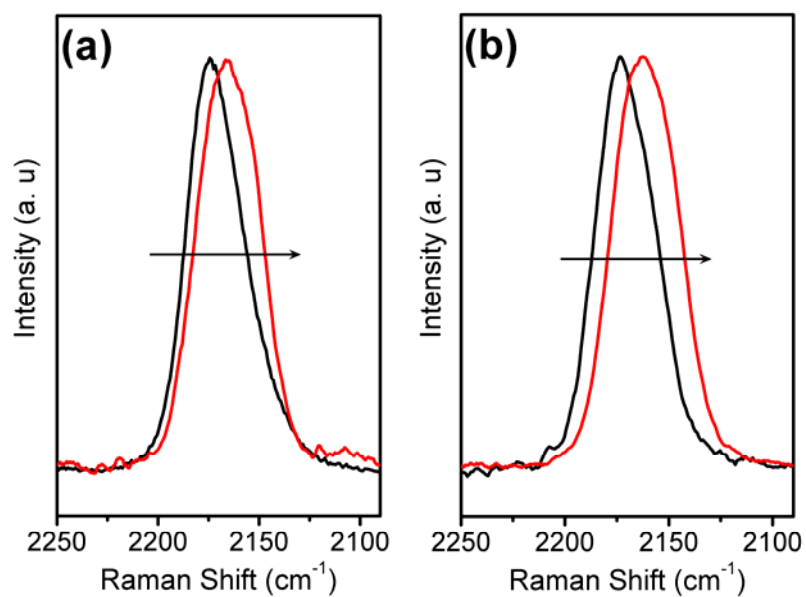

Fig. S2. Raman spectra taken under the flow of (a) acetone and (b) ammonia vapor over 2,6-DMPI-adsorbed Ag nanoparticle aggregates on a mica substrate put in a glass capillary. See Scheme 1 in the text.

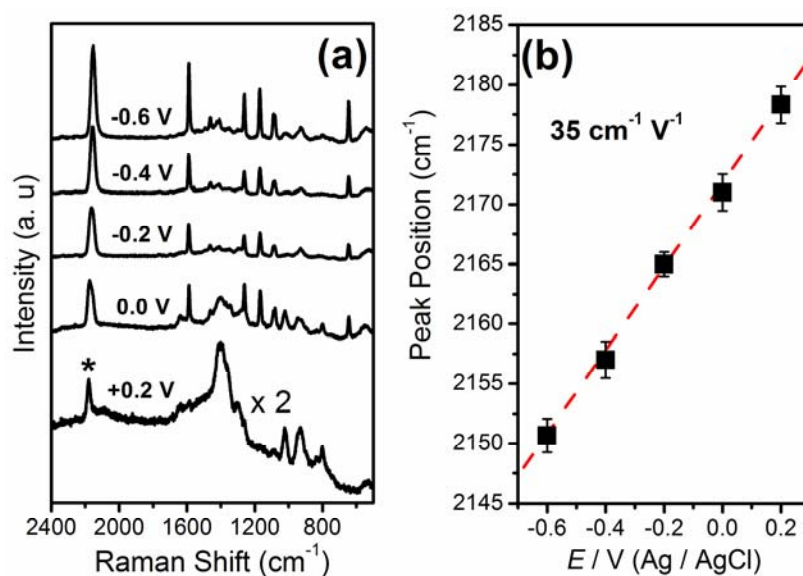

Fig. S3. (a) Potential-dependent SERS spectra of 2,6-DMPI on an Ag wire electrode in 0.1 M NaClO<sub>4</sub> aqueous solution. (b) Position of the NC stretching peak of 2,6-DMPI on Ag drawn versus the applied potential in (a).

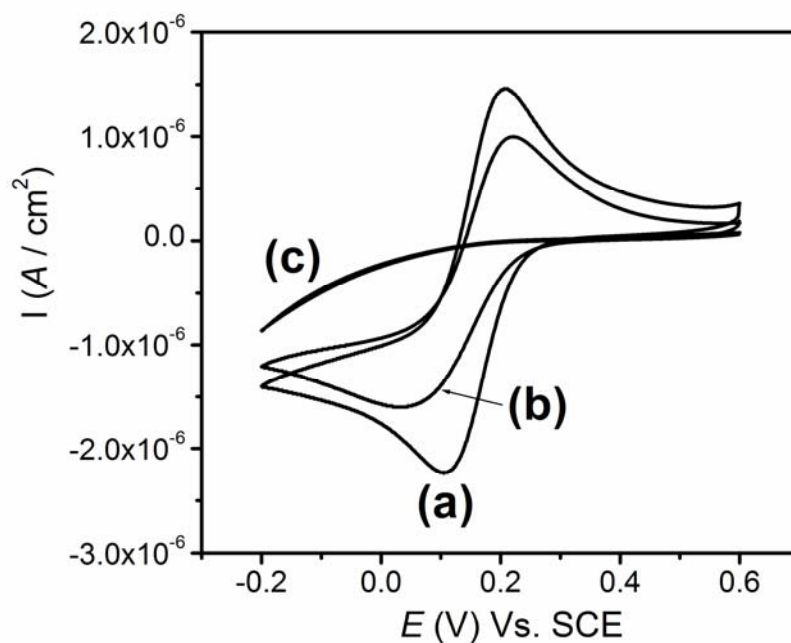

Fig. S4. Cyclic voltammograms of ferricyanide measured at a scan rate of 20 mV/s on (a) bare Au, (b) 2,6-DMPI-adsorbed Au, and (c) dodecanethiol-adsorbed Au electrodes in an aqueous solution containing 0.1 M KCl and 1 mM  $\text{K}_3\text{Fe}(\text{CN})_6$ .
